# Supplementary material for: Consistency of mouse models with human intracerebral hemorrhage: core targets and non-coding RNA regulatory axis
Source: publisher site journal article supplement (doi:10.18632/aging.205473), 2024-01-24
Supplement: Supplementary file [file aging-v16i2-205473-supplementary-material-SD1.pdf]

SUPPLEMENTARY FIGURES

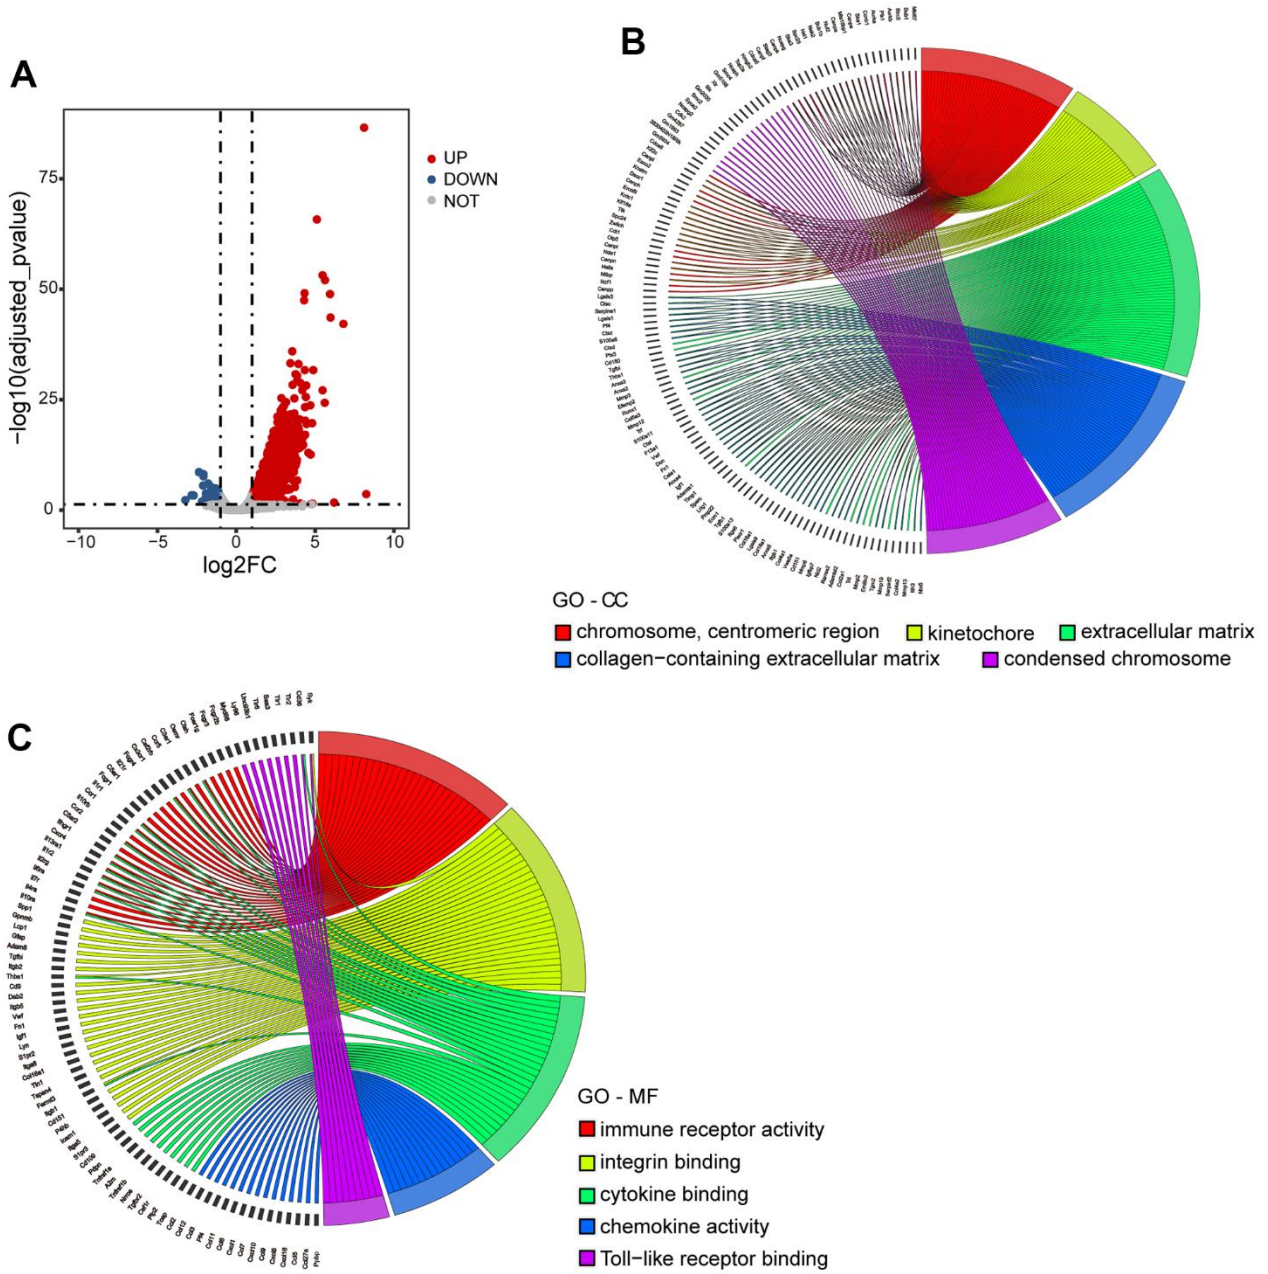

**Supplementary Figure 1. Volcano mapping and other functional analyses of DEGs in ICH mice.** (A) Volcano mapping of DEGs from ICH 3d compared to Con. ( $n=3$ ,  $|\log_2\text{FC}|>1$ ,  $p.\text{adj}<0.05$ ). (B) Top 5 Cell Components (CCs) of GO and DEGs involved. (ICH 3d vs. Con,  $p.\text{adj} \leq 2.21 \times 10^{-11}$ ). (C) Top 5 Molecular Functions (MFs) of GO and DEGs involved. (ICH 3d vs. Con,  $p.\text{adj} \leq 2.95 \times 10^{-7}$ ).

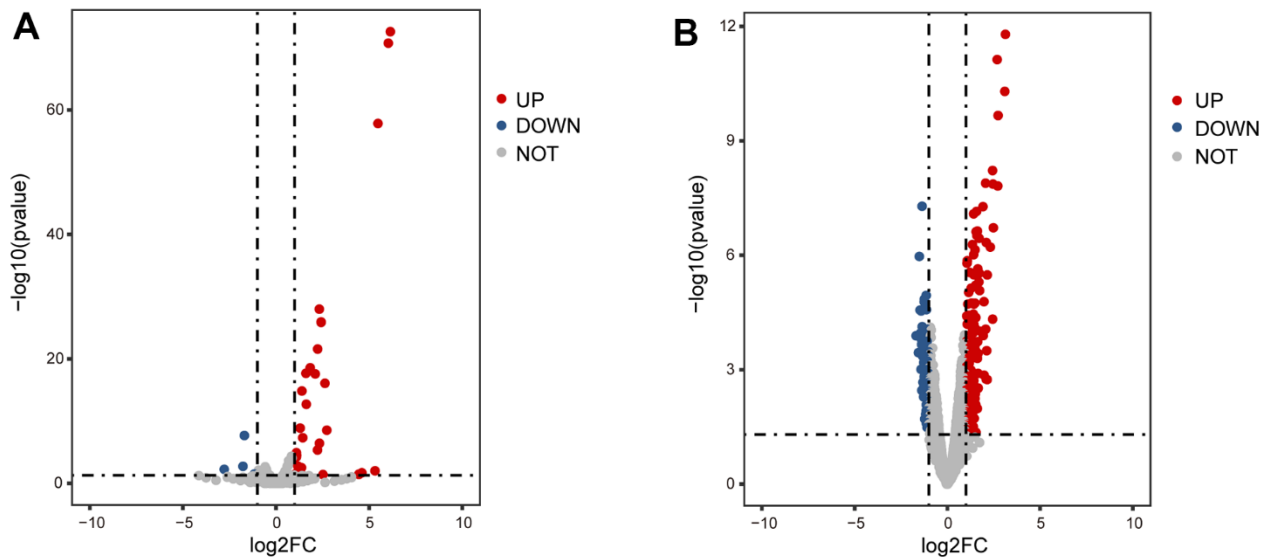

**Supplementary Figure 2. Volcano mappings of miRNAs/circRNAs in ICH mice.** (A) Volcano mapping of DE miRNAs from ICH 3d compared to Con. (n=3,  $|\log_2FC| > 1$ ,  $p < 0.05$ ). (B) Volcano mapping of DE circRNAs from ICH 3d compared to Con. (n=3,  $|\log_2FC| > 1$ ,  $p < 0.05$ ).

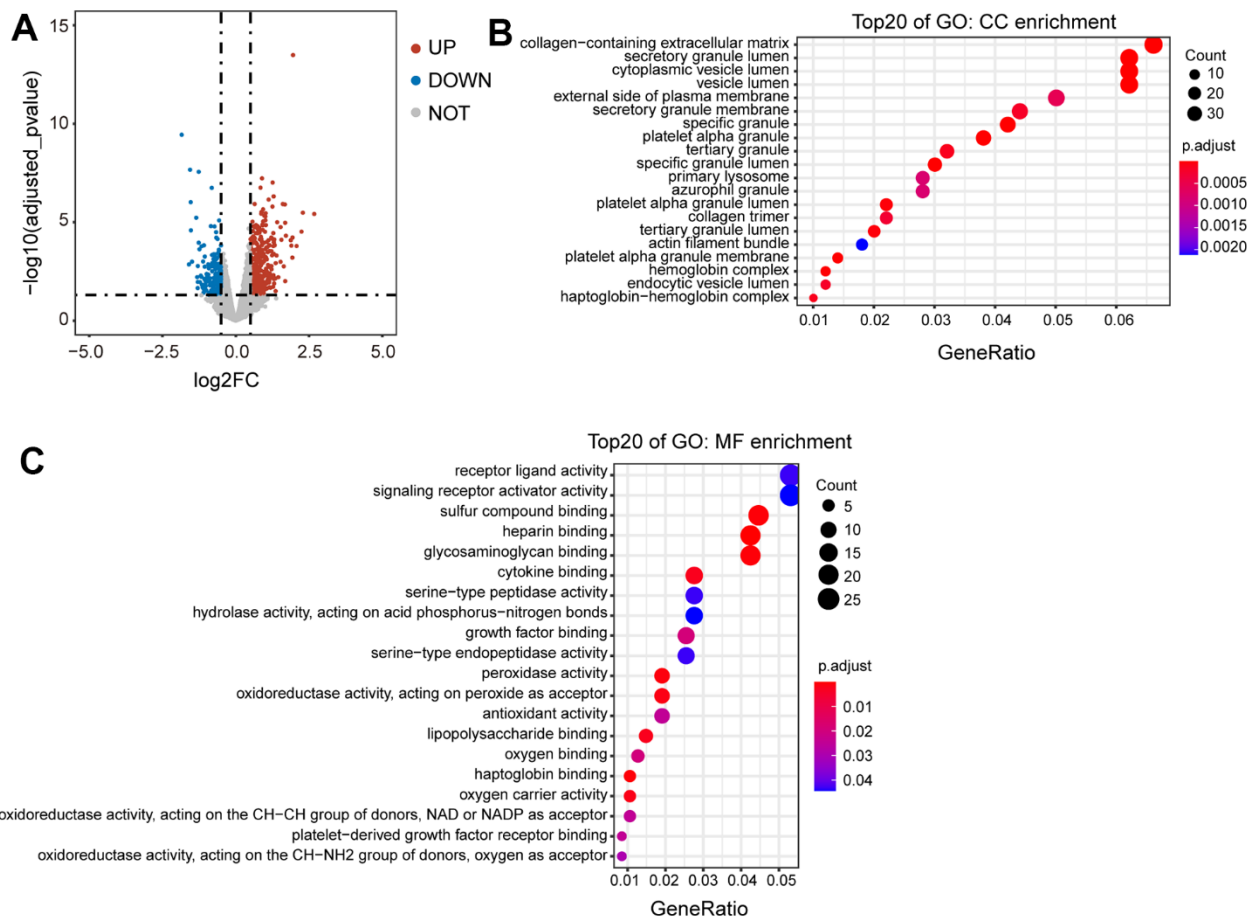

**Supplementary Figure 3. Volcano mapping and other functional analyses of DEGs in ICH patients.** (A) Volcano mapping of DEGs from ICH 72h compared to ICH 24h. (n=11,  $|\log_2FC| > 0.5$ ,  $p_{adj} < 0.05$ ). (B) Top 20 Cell Components (CCs) of GO and DEGs involved. (ICH 72h vs. ICH 24h,  $p_{adj} < 0.001$ ). (C) Top 20 Molecular Functions (MFs) of GO and DEGs involved. (ICH 72h vs. ICH 24h,  $p_{adj} \leq 0.044$ ).
